# Supplementary material
Source: ML conference proceedings conference paper supplement (https://aclanthology.org/D19-1099)
Supplement: Attachment [file D19-1099.Attachment.pdf]

# Supplementary Material

## Variables Summary

| Variable                  | Domain                                      | Description                                        |
|---------------------------|---------------------------------------------|----------------------------------------------------|
| $n$                       | $\mathbb{N}_+$                              | sentence length                                    |
| $r$                       | $\mathbb{N}_+$                              | number of semantic roles                           |
| $m$                       | $\mathbb{N}_+$                              | number of senses                                   |
| $T$                       | $\mathbb{N}_+$                              | number of refinement iterations                    |
| $j$                       | $\mathbb{N}_+$                              | position of the given predicate                    |
| $R$                       | $\Delta_{r-1}^n$                            | semantic roles probability                         |
| $P$                       | $\Delta_{m-1}$                              | senses probability                                 |
| $\Pi$                     | $\mathbb{R}^{m \times d_\pi}$               | predicate senses embedding                         |
| $x^w$                     | $\mathbb{R}^{n \times d_w}$                 | sentence tokens embeddings                         |
| $x^{\text{dep}}$          | $\mathbb{R}^{n \times d_\delta}$            | dependency labels embeddings                       |
| $x^{\text{pos}}$          | $\mathbb{R}^{n \times d_p}$                 | part-of-speech tags embeddings                     |
| $x$                       | $\mathbb{R}^{n \times (d_w + d_\pi + d_p)}$ | concatenated representation                        |
| <b>Baseline Model</b>     |                                             |                                                    |
| $h$                       | $\mathbb{R}^{n \times d_h}$                 | encoded sentence representation                    |
| $h^{\rho_0}$              | $\mathbb{R}^{n \times d_{\rho_0}}$          | argument feature for null role logits              |
| $h^{\rho_1}$              | $\mathbb{R}^{n \times d_{\rho_1}}$          | argument feature for other roles logits            |
| $h^{\rho_0}$              | $\mathbb{R}^{d_{\rho_0}}$                   | predicate feature for null role logits             |
| $h^{\rho_1}$              | $\mathbb{R}^{d_{\rho_1}}$                   | predicate feature for other roles logits           |
| $I^{\rho_0}$              | $\mathbb{R}^n$                              | null role logits                                   |
| $I^{\rho_1}$              | $\mathbb{R}^{n \times (r-1)}$               | other roles logits                                 |
| $I^\alpha$                | $\mathbb{R}^{n \times r}$                   | roles logits                                       |
| $h^\pi$                   | $\mathbb{R}^{d_\pi}$                        | predicate feature for sense disambiguation         |
| $I^\pi$                   | $\mathbb{R}^m$                              | sense logits                                       |
| <b>Refinement Network</b> |                                             |                                                    |
| $g$                       | $\mathbb{R}^{n \times d_g}$                 | encoded sentence representation                    |
| $g^\alpha$                | $\mathbb{R}^{n \times d_\alpha}$            | argument feature                                   |
| $g^\pi$                   | $\mathbb{R}^{d_\pi}$                        | predicate feature                                  |
| $o_i$                     | $\mathbb{R}^{r-1}$                          | sum of other roles                                 |
| $z_i^\alpha$              | $\mathbb{R}^{2r-1+2d_g+d_\pi}$              | input to role refinement network                   |
| $M^\alpha$                | $\mathbb{R}^{n \times r}$                   | refinement role logits to be added with $I^\alpha$ |
| $r_\pi$                   | $\mathbb{R}^{r-1}$                          | sum of all roles                                   |
| $z^\pi$                   | $\mathbb{R}^{2r-1+2d_g+d_\pi}$              | input to sense refinement network                  |
| $M^\pi$                   | $\mathbb{R}^m$                              | refinement sense logits to be added with $I^\pi$   |

Table 1: Variables domain and description

## Networks

| Network | Description                               |
|---------|-------------------------------------------|
| BiLSTM  | 3 layers stacked highway BiLSTM           |
| MLP     | 1 layer MLP with exponential linear units |

Table 2: Networks for all languages at all occurrence in the main text. Note that the input and output dimensions of MLP and BiLSTM can be decided by the other hyper-parameters at each occurrence.

## Hyper-Parameters

| Hyper-parameter    | Value   |        | Description                                    |
|--------------------|---------|--------|------------------------------------------------|
|                    | English | Others |                                                |
| $p$                | 0.3     |        | dropout rate for all neural modules            |
| $p_r$              | 0.3     |        | recurrent dropout rate for BiLSTMs             |
| $d_w$              | 1024    | 300    | tokens embedding dimension                     |
| $d_\delta$         | 64      |        | dependency label embedding dimension           |
| $d_p$              | 64      |        | part-of-speech tags embedding dimension        |
| $d_h$              | 500     | 428    | BiLSTM hidden state dimension in one direction |
| $d_{\rho_0}$       | 300     |        | dimension for feature for null role logits     |
| $d_{\rho_1}$       | 128     |        | dimension for feature for other role logits    |
| $d_g$              | 200     |        | dimension for feature for refinement networks  |
| $d_r$              | 200     |        | hidden dimension of refinement networks        |
| $\lambda_g^\pi$    | 50      |        | multiplier of Gumbel noise for sense logits    |
| $\lambda_g^\alpha$ | 5       |        | multiplier of Gumbel noise for role logits     |

Table 3: Hyper-parameters value and description. Note that the input and output dimensions of MLP and BiLSTM can be decided by the other hyper-parameters at each occurrence.

## References

- Djork-Arné Clevert, Thomas Unterthiner, and Sepp Hochreiter. 2016. [Fast and accurate deep network learning by exponential linear units \(elus\)](#). In *4th International Conference on Learning Representations, ICLR 2016, San Juan, Puerto Rico, May 2-4, 2016, Conference Track Proceedings*.
- Yarin Gal and Zoubin Ghahramani. 2016. [A theoretically grounded application of dropout in recurrent neural networks](#). In *Proceedings of the 30th International Conference on Neural Information Processing Systems, NIPS'16*, pages 1027–1035, USA. Curran Associates Inc.
- Rupesh Kumar Srivastava, Klaus Greff, and Jürgen Schmidhuber. 2015. [Training very deep networks](#). In *Advances in Neural Information Processing Systems 28: Annual Conference on Neural Information Processing Systems 2015, December 7-12, 2015, Montreal, Quebec, Canada*, pages 2377–2385.
